# Supplementary material
Source: PubMed Central journal article supplement (PMC10216829)

**A** MBON<sup>MB083C</sup> Gal4 in the gut

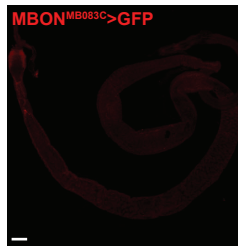

Inhibition and activation of MBON<sup>MB083C</sup> cells

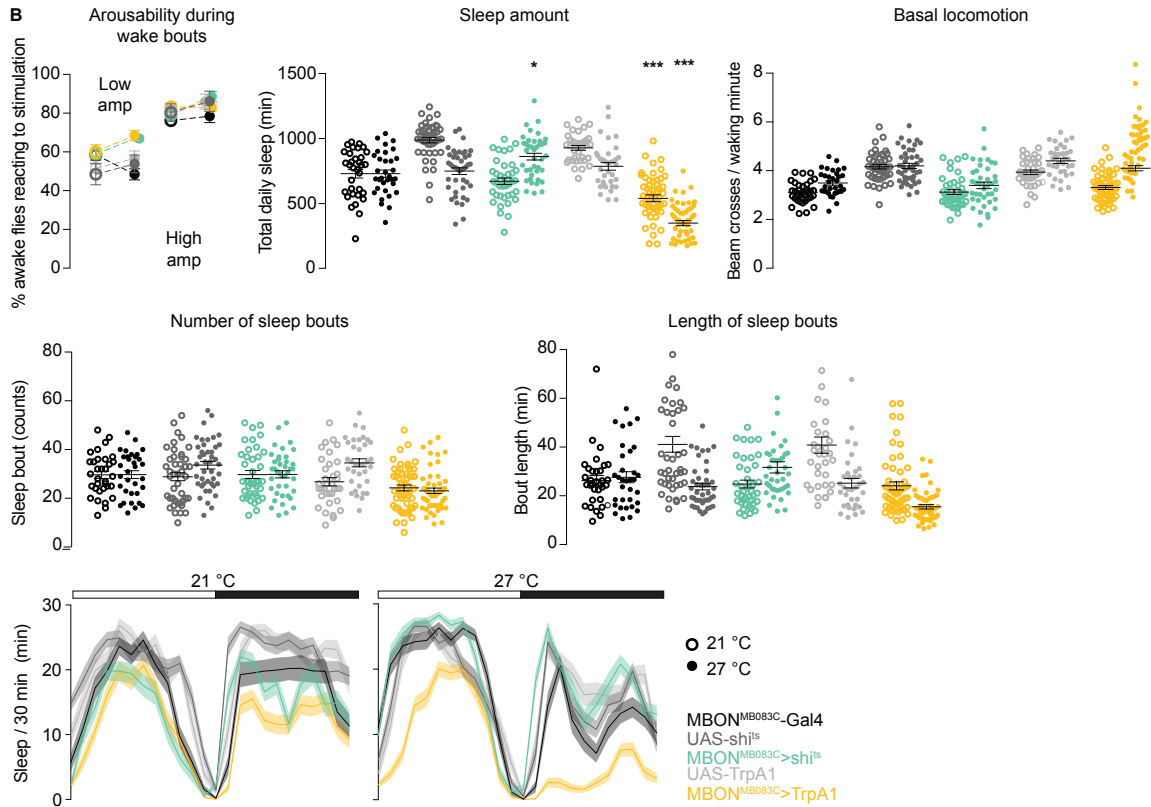

**C** Arousability during wake bouts

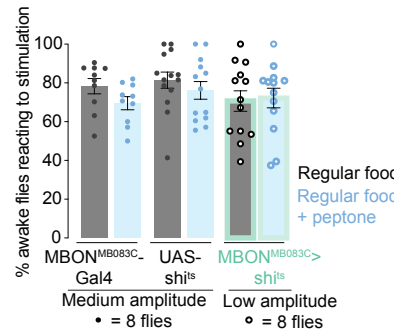

**D** Arousability during wake bouts

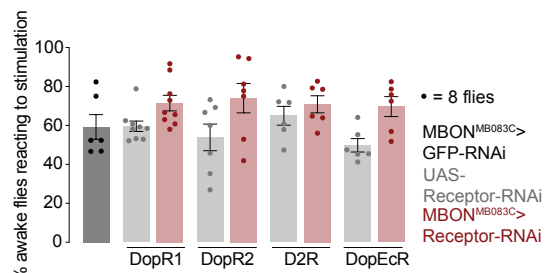

**E**

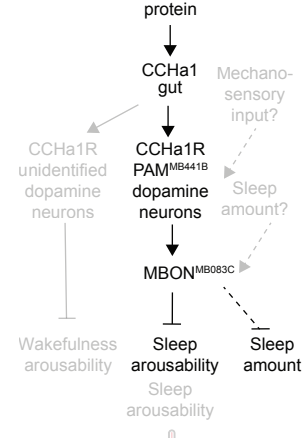

Supplement: NIHMS1878536-supplement-7.pdf [file NIHMS1878536-supplement-7.pdf]
