# Supplementary material
Source: PubMed Central journal article supplement (PMC10216829)
Supplement: NIHMS1878536-supplement-9.pdf [file NIHMS1878536-supplement-9.pdf]

**Table S1. List of genes from the screen that when knocked down using elav-Gal4 show hypo or hyper-arousable phenotypes. Related to Figure 1.**

| <b>Screen hits hyper-arousable</b> | <b>Screen hits hypo-arousable</b> |
|------------------------------------|-----------------------------------|
| CG10001                            | CG10006                           |
| CG10002                            | CG1004                            |
| CG1004                             | CG10143                           |
| CG10268                            | CG10295                           |
| CG10377                            | CG10334                           |
| CG10449                            | CG10388                           |
| CG10899                            | CG10537                           |
| CG1098                             | CG10572                           |
| CG10990                            | CG10579                           |
| CG11177                            | CG10701                           |
| CG12069                            | CG10823                           |
| CG12367                            | CG10850                           |
| CG12819                            | CG10877                           |
| CG13575                            | CG10901                           |
| CG14026                            | CG10907                           |
| CG14230                            | CG10967                           |
| CG14358                            | CG10990                           |
| CG14472                            | CG11331                           |
| CG14686                            | CG11420                           |
| CG15497                            | CG11556                           |
| CG15522                            | CG11937                           |
| CG16725                            | CG12170                           |
| CG16901                            | CG12348                           |
| CG17161                            | CG12386                           |
| CG17471                            | CG12505                           |
| CG17686                            | CG12559                           |
| CG18402                            | CG13204                           |
| CG18572                            | CG13575                           |
| CG18660                            | CG13779                           |
| CG1887                             | CG13784                           |
| CG2087                             | CG14562                           |
| CG2615                             | CG1464                            |
| CG2845                             | CG15793                           |

|         |         |
|---------|---------|
| CG2846  | CG1641  |
| CG30106 | CG16725 |
| CG3143  | CG16901 |
| CG3171  | CG17077 |
| CG3178  | CG17239 |
| CG32110 | CG17269 |
| CG32139 | CG1773  |
| CG32281 | CG18455 |
| CG32445 | CG1848  |
| CG32498 | CG2124  |
| CG33276 | CG2210  |
| CG34381 | CG2331  |
| CG3593  | CG2647  |
| CG3705  | CG31000 |
| CG42250 | CG31522 |
| CG42341 | CG3225  |
| CG4313  | CG32425 |
| CG4322  | CG33119 |
| CG4385  | CG3326  |
| CG4637  | CG33467 |
| CG4927  | CG33956 |
| CG5216  | CG3466  |
| CG5517  | CG3613  |
| CG5671  | CG3871  |
| CG6054  | CG3884  |
| CG6315  | CG4016  |
| CG6355  | CG40351 |
| CG6438  | CG42341 |
| CG6496  | CG4320  |
| CG6951  | CG4444  |
| CG7437  | CG4475  |
| CG8167  | CG4703  |
| CG8173  | CG4706  |
| CG8318  | CG5025  |
| CG8726  | CG5308  |
| CG8950  | CG5432  |
| CG9696  | CG5436  |
|         | CG5610  |
|         | CG5813  |

|  |        |
|--|--------|
|  | CG5920 |
|  | CG5941 |
|  | CG5992 |
|  | CG6196 |
|  | CG6496 |
|  | CG6498 |
|  | CG6703 |
|  | CG6736 |
|  | CG6854 |
|  | CG6963 |
|  | CG7204 |
|  | CG7281 |
|  | CG7391 |
|  | CG7429 |
|  | CG7599 |
|  | CG7643 |
|  | CG7971 |
|  | CG8172 |
|  | CG8318 |
|  | CG8525 |
|  | CG8795 |
|  | CG8952 |
|  | CG8964 |
|  | CG9310 |
|  | CG9554 |
|  | CG9746 |

**Table S2. Gene ontology analysis of genes from the screen that when knocked down using elav-Gal4 show hypo or hyper-arousable phenotypes (shown in Table S1) for biological process and molecular function. Related to Figure 1.**

| <b>GO Term</b>                                           | <b>GO for hits from the screen normalized to GO representation in the genome (<math>\log_{10}</math>)</b> |
|----------------------------------------------------------|-----------------------------------------------------------------------------------------------------------|
| <b>BIOLOGICAL PROCESS</b>                                |                                                                                                           |
| homeostatic process                                      | 1.065574865                                                                                               |
| aging                                                    | 0.987099215                                                                                               |
| protein maturation                                       | 0.956430396                                                                                               |
| cell proliferation                                       | 0.912651471                                                                                               |
| autophagy                                                | 0.841718299                                                                                               |
| growth                                                   | 0.830187807                                                                                               |
| nucleocytoplasmic transport                              | 0.732199922                                                                                               |
| cell motility                                            | 0.716456307                                                                                               |
| cell junction organization                               | 0.712243195                                                                                               |
| embryo development                                       | 0.666625448                                                                                               |
| anatomical structure formation involved in morphogenesis | 0.665384621                                                                                               |
| developmental maturation                                 | 0.660551223                                                                                               |
| signal transduction                                      | 0.657551721                                                                                               |
| mRNA processing                                          | 0.637099248                                                                                               |
| cell morphogenesis                                       | 0.59315913                                                                                                |
| cell death                                               | 0.584547386                                                                                               |
| vacuolar transport                                       | 0.582121661                                                                                               |
| cell division                                            | 0.576073637                                                                                               |
| immune system process                                    | 0.574577207                                                                                               |
| extracellular matrix organization                        | 0.529733592                                                                                               |
| cell-cell signaling                                      | 0.529229621                                                                                               |
| locomotion                                               | 0.525177073                                                                                               |
| carbohydrate metabolic process                           | 0.518295756                                                                                               |
| tRNA metabolic process                                   | 0.497947583                                                                                               |
| cell adhesion                                            | 0.481016299                                                                                               |
| cell differentiation                                     | 0.447255037                                                                                               |
| reproduction                                             | 0.441586708                                                                                               |
| cellular protein modification process                    | 0.441004956                                                                                               |
| catabolic process                                        | 0.392757579                                                                                               |
| vesicle-mediated transport                               | 0.387641945                                                                                               |
| response to stress                                       | 0.37764218                                                                                                |

|                                                                       |              |
|-----------------------------------------------------------------------|--------------|
| secondary metabolic process                                           | 0.367006294  |
| cytoskeleton organization                                             | 0.361104894  |
| cellular amino acid metabolic process                                 | 0.358399893  |
| nucleobase-containing compound catabolic process                      | 0.351819547  |
| anatomical structure development                                      | 0.343807062  |
| pigmentation                                                          | 0.340677356  |
| lipid metabolic process                                               | 0.332409353  |
| small molecule metabolic process                                      | 0.328735463  |
| mitotic cell cycle                                                    | 0.316436327  |
| cell cycle                                                            | 0.306889032  |
| nervous system process                                                | 0.266357462  |
| cellular component assembly                                           | 0.253477679  |
| transport                                                             | 0.2194312    |
| cellular nitrogen compound metabolic process                          | 0.218271345  |
| cofactor metabolic process                                            | 0.2155998    |
| ribonucleoprotein complex assembly                                    | 0.173186268  |
| sulfur compound metabolic process                                     | 0.12786329   |
| DNA metabolic process                                                 | 0.072550667  |
| biosynthetic process                                                  | 0.064588952  |
| chromosome organization                                               | 0.046000045  |
| generation of precursor metabolites and energy                        | 0            |
| membrane organization                                                 | -0.052123013 |
| transmembrane transport                                               | -0.17366367  |
| translation                                                           | -0.277145243 |
| protein-containing complex assembly                                   | -0.451095827 |
| <b>MOLECULAR FUNCTION</b>                                             |              |
| kinase activity                                                       | 0.858508     |
| hydrolase activity, acting on carbon-nitrogen (but not peptide) bonds | 0.724804     |
| transcription factor binding                                          | 0.65505      |
| lyase activity                                                        | 0.446828     |
| ubiquitin-like protein binding                                        | 0.439333     |
| mRNA binding                                                          | 0.42928      |
| protein binding, bridging                                             | 0.38818      |
| DNA-binding transcription factor activity                             | 0.385194     |
| ion binding                                                           | 0.331274     |
| methyltransferase activity                                            | 0.321338     |
| peptidase activity                                                    | 0.272028     |
| isomerase activity                                                    | 0.269316     |
| phosphatase activity                                                  | 0.197556     |

|                                                    |           |
|----------------------------------------------------|-----------|
| enzyme binding                                     | 0.184427  |
| enzyme regulator activity                          | 0.176641  |
| lipid binding                                      | 0.173892  |
| DNA binding                                        | 0.168122  |
| RNA binding                                        | 0.138185  |
| cytoskeletal protein binding                       | 0.089542  |
| histone binding                                    | 0.034214  |
| unfolded protein binding                           | 0.027152  |
| ATPase activity                                    | 0.006664  |
| helicase activity                                  | 0.006631  |
| hydrolase activity, acting on glycosyl bonds       | -0.043779 |
| transferase activity, transferring acyl groups     | -0.058403 |
| ligase activity                                    | -0.109875 |
| transmembrane transporter activity                 | -0.11521  |
| nuclease activity                                  | -0.119975 |
| transferase activity, transferring glycosyl groups | -0.294399 |
| structural constituent of ribosome                 | -0.45921  |
| oxidoreductase activity                            | -0.545007 |
| structural molecule activity                       | -0.782516 |
